# Supplementary material for: Tilt grain boundaries in WS2 from low to high misorientation angles
Source: Royal Society of Chemistry journal article supplement (doi:10.1039/d2na00709f), 2023-01-01
Supplement: d2na00709f1.pdf [file d2na00709f1.pdf]

## Supplementary Materials

### Tilt grain boundaries in WS<sub>2</sub> from the low to high misorientation angles

Da Ke, Jinquan Hong, and Yubo Zhang\*

*Minjiang Collaborative Center for Theoretical Physics, College of Physics and Electronic Information Engineering,  
Minjiang University, Fuzhou 350108, China*

Corresponding email address: [yubo.drzhang@mju.edu.cn](mailto:yubo.drzhang@mju.edu.cn)

## Contents

|                                                                                               |    |
|-----------------------------------------------------------------------------------------------|----|
| <b>1. Other details of the coincidence site lattice (CSL) theory for WS<sub>2</sub></b> ..... | 2  |
| <b>2. First-principle simulation details</b> .....                                            | 2  |
| <b>3. Relaxed structural models</b> .....                                                     | 3  |
| <b>3.1. The family of <math>nd = 1</math></b> .....                                           | 3  |
| <b>3.2. The family of <math>nd = 2</math></b> .....                                           | 6  |
| <b>3.3. The family of <math>nd = 3</math></b> .....                                           | 8  |
| <b>3.4. The family of <math>nd = 4</math></b> .....                                           | 10 |
| <b>4. Weak magnetic instability</b> .....                                                     | 11 |
| <b>5. Deriving the critical angle by fitting to the Read-Shockley relation</b> .....          | 11 |
| <b>References</b> .....                                                                       | 12 |

## 1. Other details of the coincidence site lattice (CSL) theory for $WS_2$

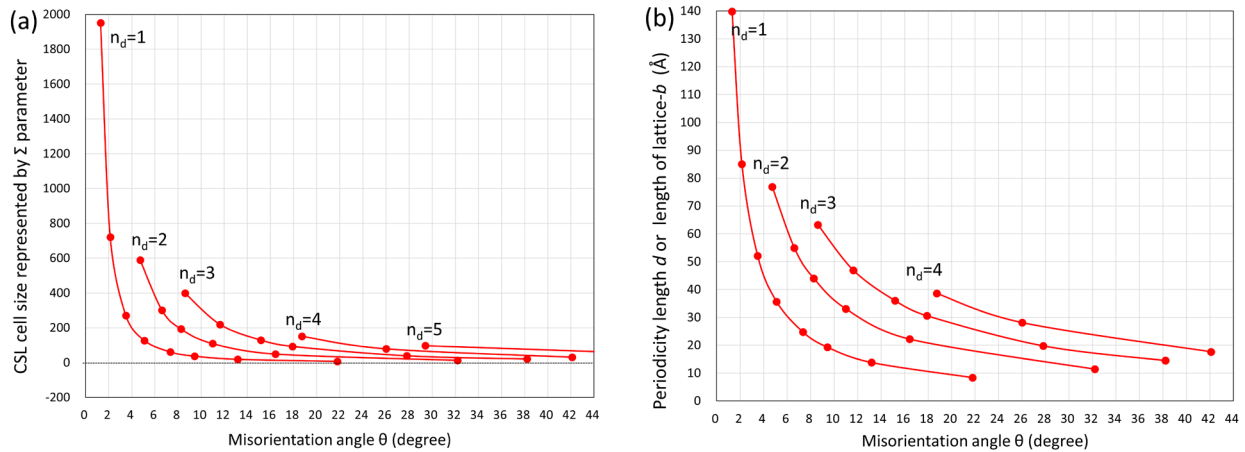

**Figure S1.** (a) The CSL cell size as a function of the misorientation angles. (b) Periodicity length as a function of misorientation angles. The systems are grouped based on the GB families  $n_d$ .

## 2. First-principle simulation details

The first-principle simulations are mainly performed using the SIESTA code [1]. The electron-ion interaction is represented by pseudopotentials in the norm-conserving method. The valence electrons of W  $5d^46s^2$  and S  $3s^23p^4$  are explicitly considered. For the basis set, the single-zeta (SZ) basis is used for the structural relaxation, and the “standard” choice of double-zeta plus polarization (DZP) is later adopted for calculating the electronic properties. Exchange-correlation functional is in the form of Perdew-Burke-Ernzerhof [2] generalized gradient approximation. Structural optimization is the key to getting the low-energy motifs of the GB models. It is a difficult task and is performed carefully. The convergence criteria are  $0.1 \text{ eV/\AA}$  for the force on atoms.

For cross-checking, calculations are also performed for a few selected systems using the all-electron FHI-aims code [3]. Formation energies from Siesta and FHI-aims code, shown in Figure S2, agree well with each other.

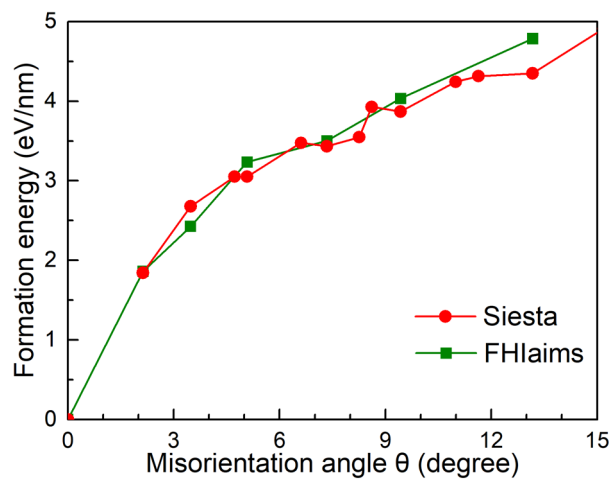

**Figure S2.** Formation energies of a few selected GB models. The results by the Siesta and FHI-aims are compared.

### 3. Relaxed structural models

#### 3.1. The family of $n_d = 1$

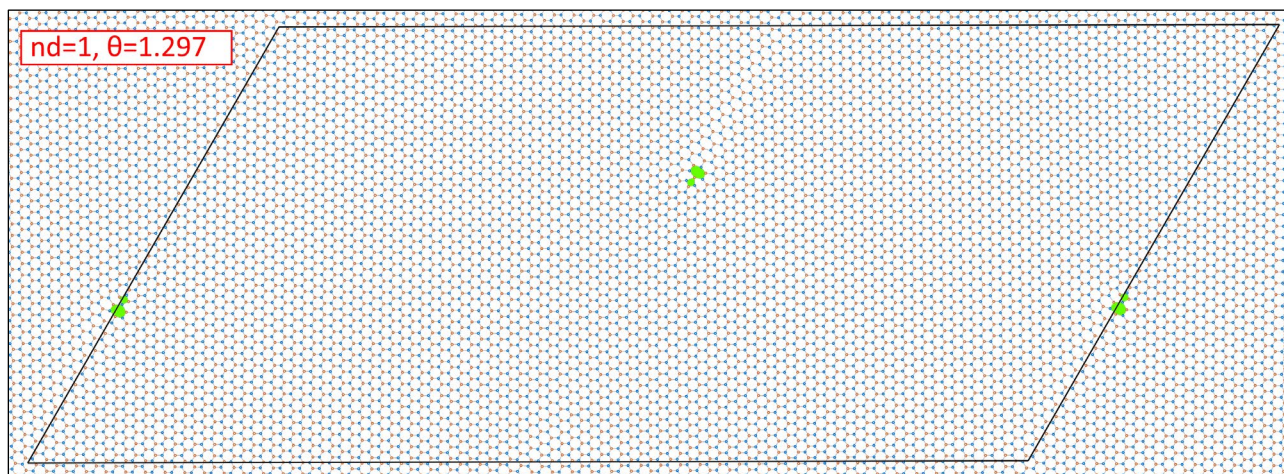

**Figure S3-1-1.** GB model of family  $n_d = 1$  and misorientation angle  $\theta = 1.297^\circ$ . The relaxed simulation cell sizes are  $a = 277.35 \text{ \AA}$  and  $b = 139.81 \text{ \AA}$ .

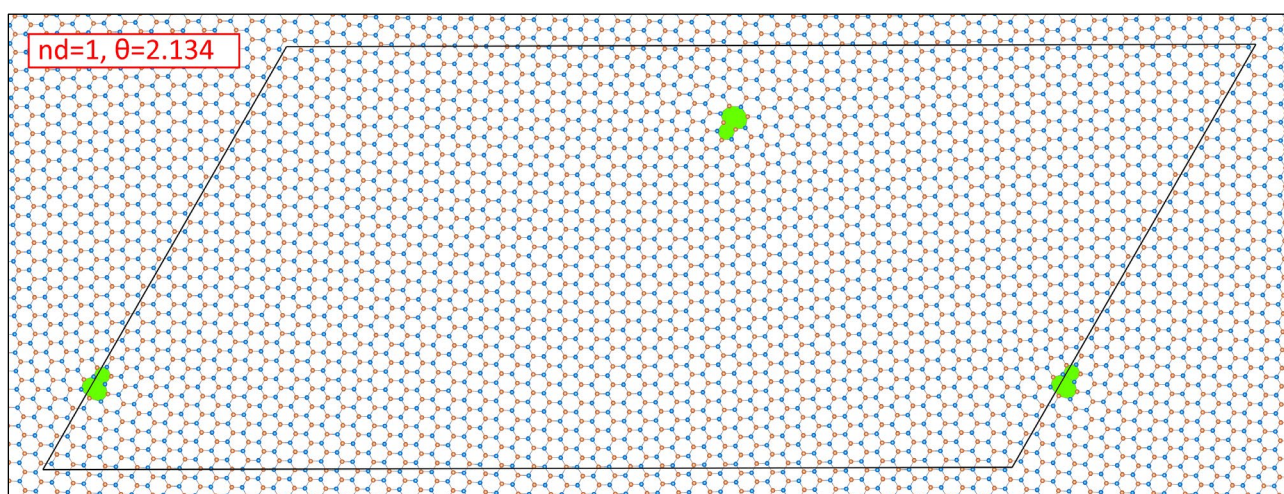

**Figure S3-1-2.** GB model of family  $n_d = 1$  and misorientation angle  $\theta = 2.134^\circ$ . The relaxed simulation cell sizes are  $a = 169.08 \text{ \AA}$  and  $b = 85.01 \text{ \AA}$ .

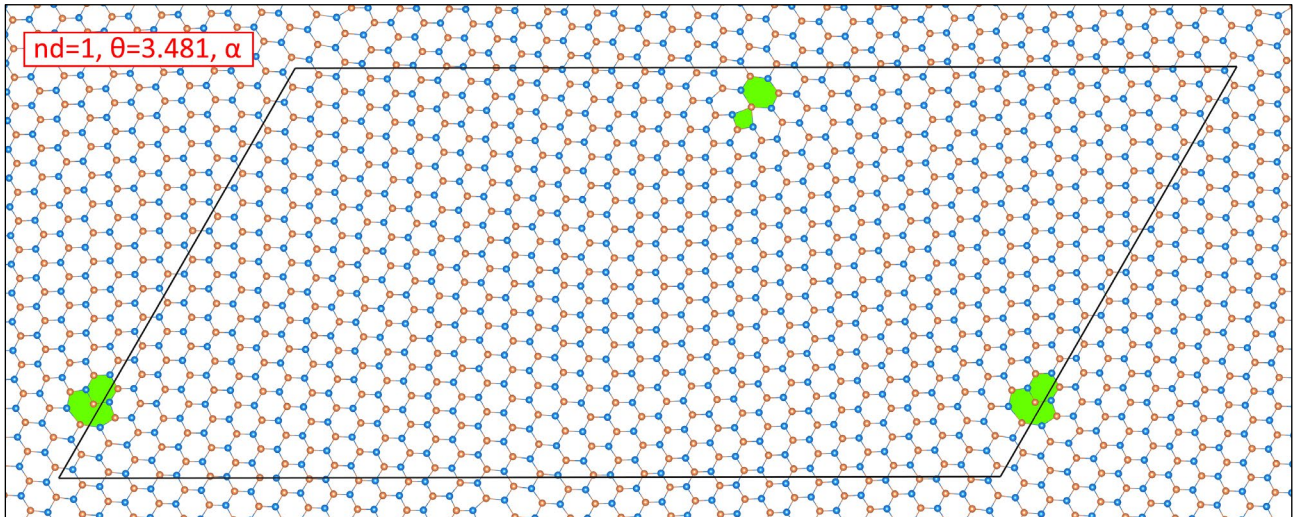

**Figure S3-1-3a.** GB model of family  $n_d = 1$  and misorientation angle  $\theta = 3.481^\circ$ . The distorted dislocations are 4|6 and 6|8 rings. The relaxed simulation cell sizes are  $a = 103.75 \text{ \AA}$  and  $b = 52.10 \text{ \AA}$ .

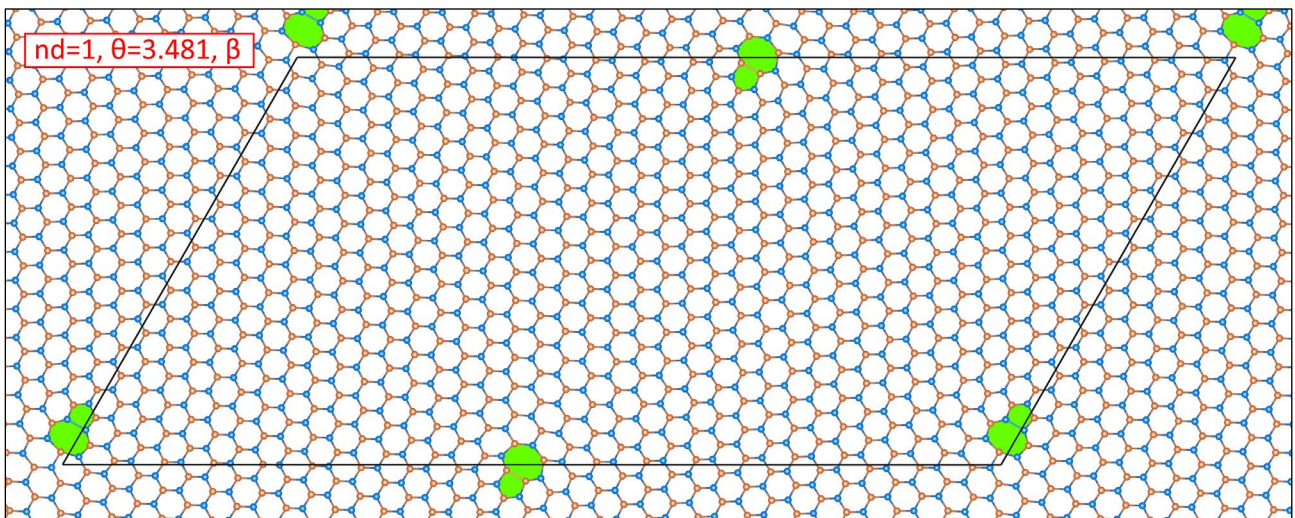

**Figure S3-1-3b.** GB model of family  $n_d = 1$  and misorientation angle  $\theta = 3.481^\circ$ . The distorted dislocations are 5|7 rings. The relaxed simulation cell sizes are  $a = 104.15 \text{ \AA}$  and  $b = 52.10 \text{ \AA}$ .

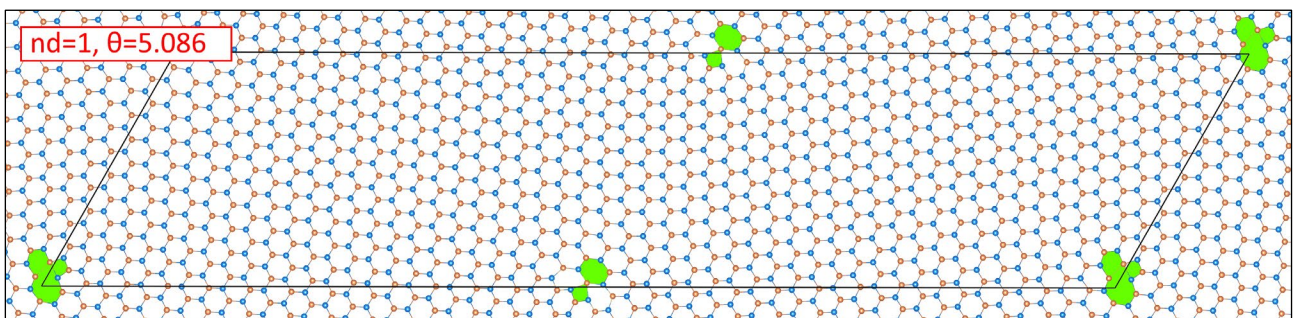

**Figure S3-1-4.** GB model of family  $n_d = 1$  and misorientation angle  $\theta = 5.086^\circ$ . The relaxed simulation cell sizes are  $a = 142.75 \text{ \AA}$  and  $b = 35.65 \text{ \AA}$ .

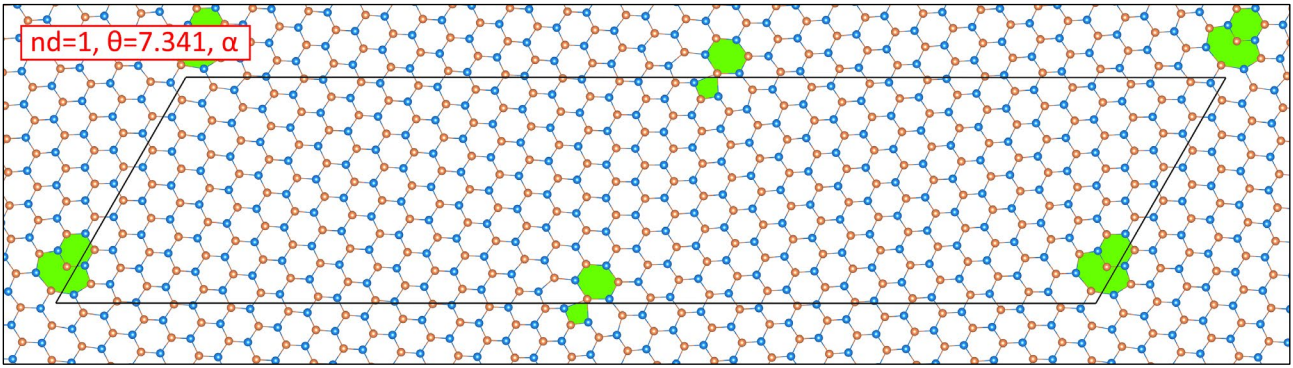

**Figure S3-1-5a.** GB model of family  $n_d = 1$  and misorientation angle  $\theta = 7.341^\circ$ . The distorted dislocations are 4|6 and 6|8 rings. The relaxed simulation cell sizes are  $a = 98.92 \text{ \AA}$  and  $b = 24.74 \text{ \AA}$ .

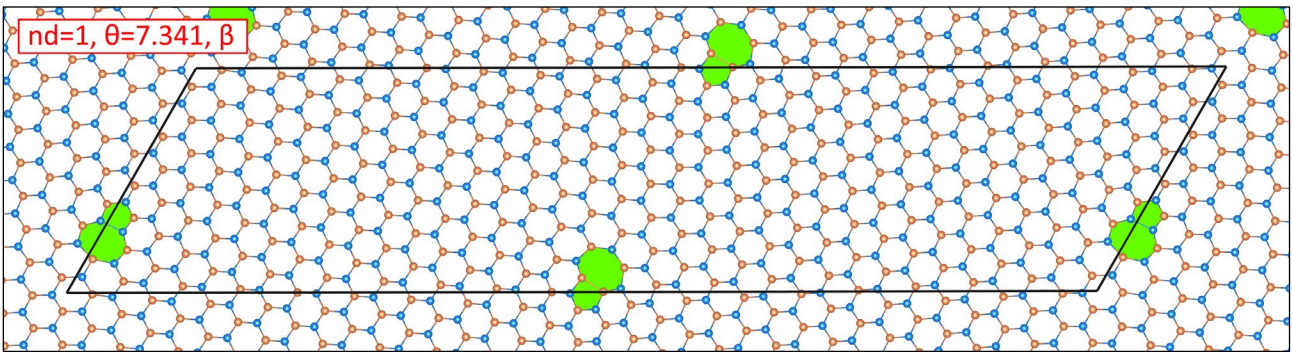

**Figure S3-1-5b.** GB model of family  $n_d = 1$  and misorientation angle  $\theta = 7.341^\circ$ . The distorted dislocations are 5|7 rings. The relaxed simulation cell sizes are  $a = 98.60 \text{ \AA}$  and  $b = 24.75 \text{ \AA}$ .

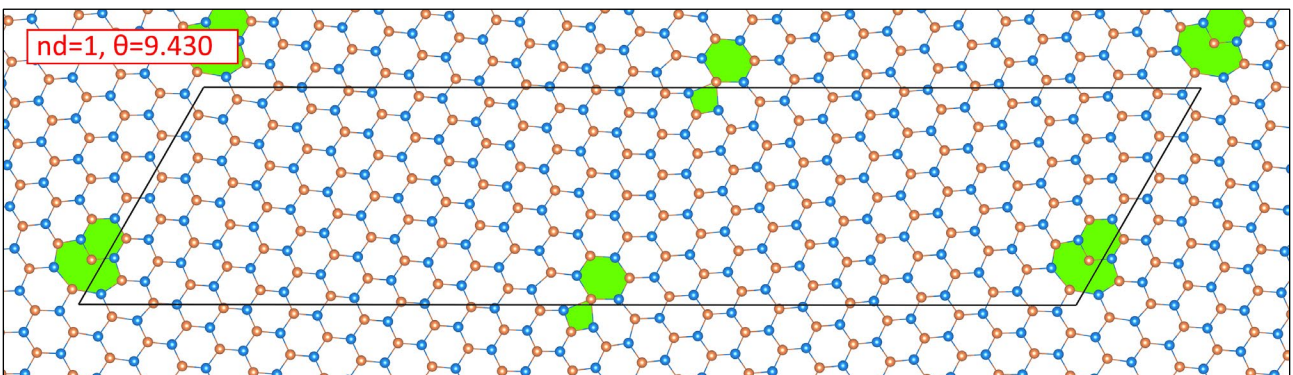

**Figure S3-1-6.** GB model of family  $n_d = 1$  and misorientation angle  $\theta = 9.430^\circ$ . The relaxed simulation cell sizes are  $a = 76.83 \text{ \AA}$  and  $b = 19.26 \text{ \AA}$ .

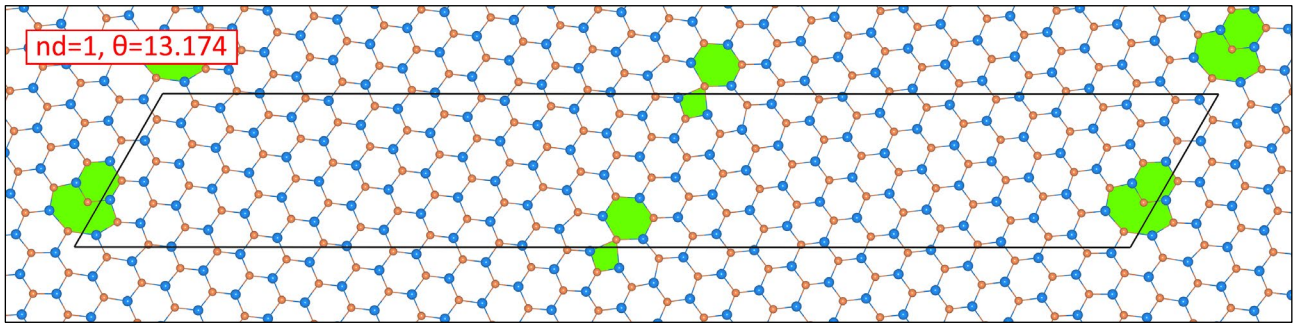

**Figure S3-1-7.** GB model of family  $n_d = 1$  and misorientation angle  $\theta = 13.174^\circ$ . The relaxed simulation cell sizes are  $a = 82.58 \text{ \AA}$  and  $b = 13.81 \text{ \AA}$ .

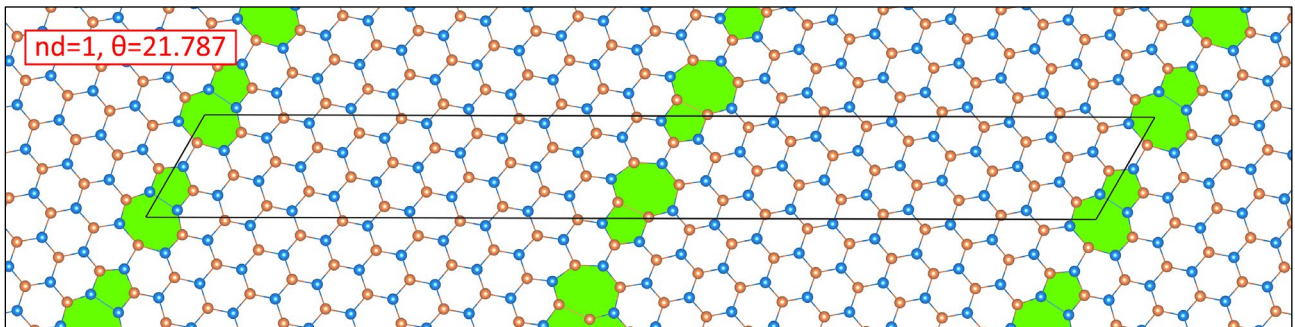

**Figure S3-1-8.** GB model of family  $n_d = 1$  and misorientation angle  $\theta = 21.787^\circ$ . The relaxed simulation cell sizes are  $a = 67.55 \text{ \AA}$  and  $b = 8.38 \text{ \AA}$ .

### 3.2. The family of $n_d = 2$

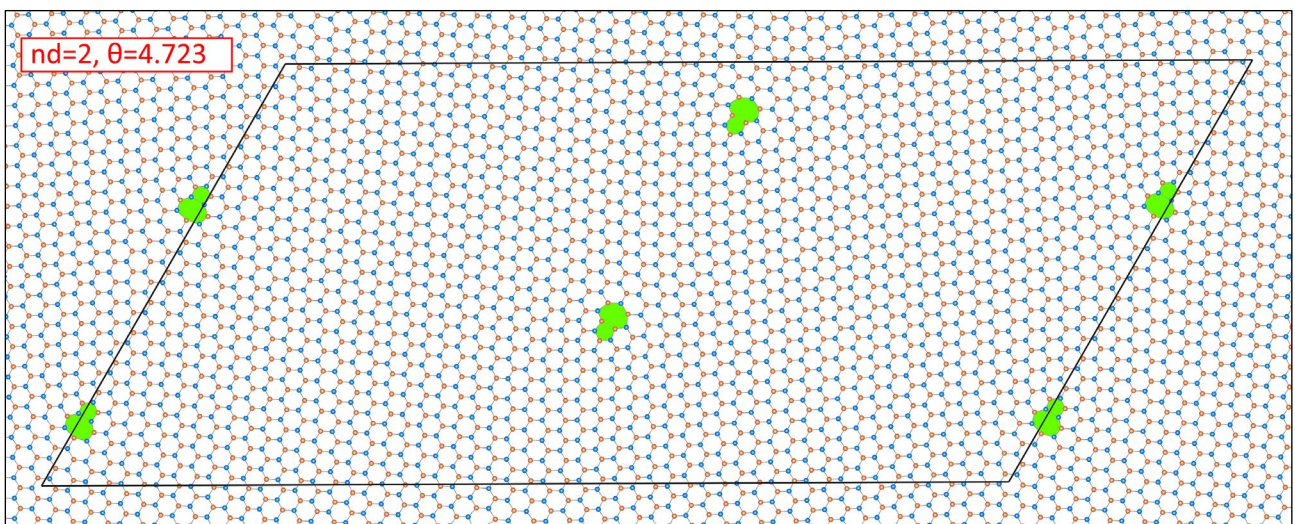

**Figure S3-2-1.** GB model of family  $n_d = 2$  and misorientation angle  $\theta = 4.723^\circ$ . The relaxed simulation cell sizes are  $a = 152.44 \text{ \AA}$  and  $b = 76.83 \text{ \AA}$ .

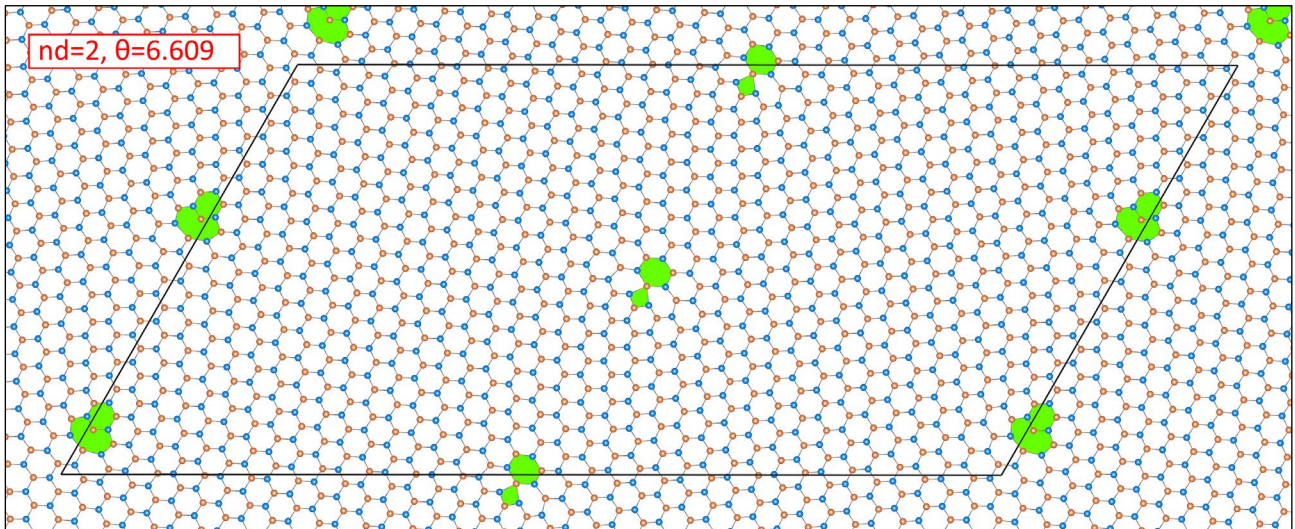

**Figure S3-2-2.** GB model of family  $n_d = 2$  and misorientation angle  $\theta = 6.609^\circ$ . The relaxed simulation cell sizes are  $a = 109.10 \text{ \AA}$  and  $b = 54.89 \text{ \AA}$ .

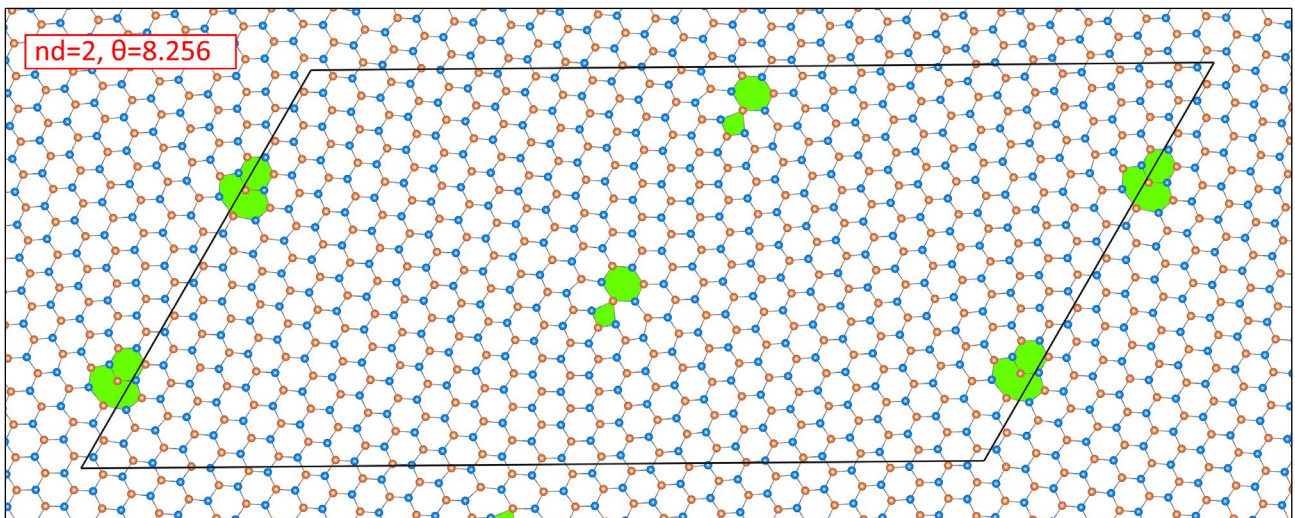

**Figure S3-2-3.** GB model of family  $n_d = 2$  and misorientation angle  $\theta = 8.256^\circ$ . The relaxed simulation cell sizes are  $a = 86.45 \text{ \AA}$  and  $b = 44.02 \text{ \AA}$ .

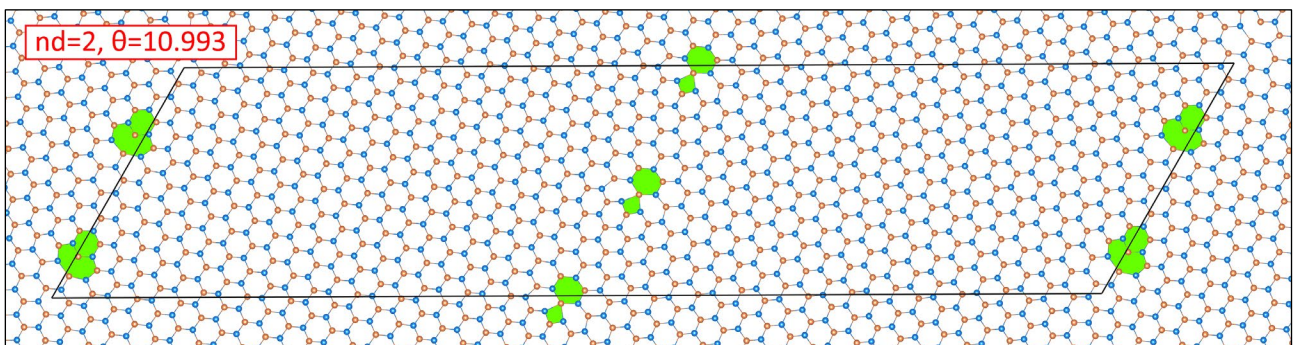

**Figure S3-2-4.** GB model of family  $n_d = 2$  and misorientation angle  $\theta = 10.993^\circ$ . The relaxed simulation cell sizes are  $a = 131.18 \text{ \AA}$  and  $b = 33.08 \text{ \AA}$ .

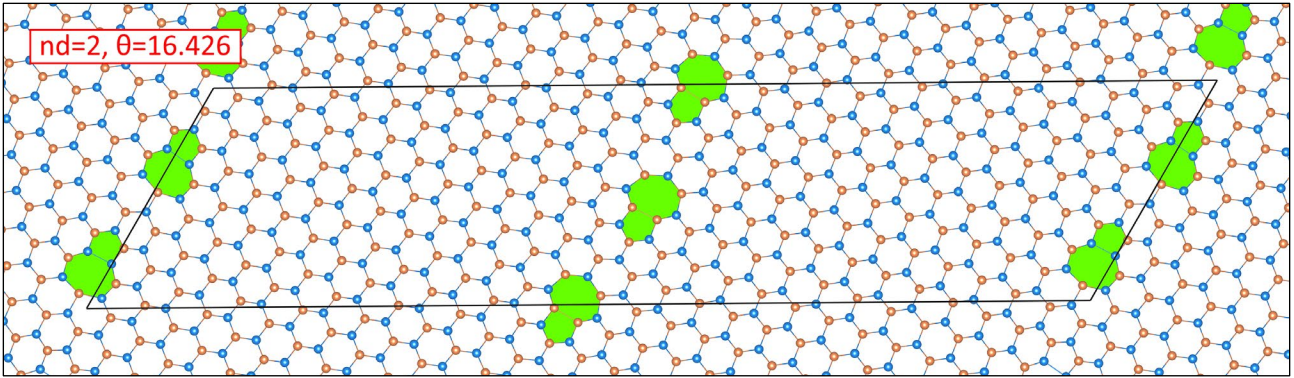

**Figure S3-2-5.** GB model of family  $n_d = 2$  and misorientation angle  $\theta = 16.426^\circ$ . The relaxed simulation cell sizes are  $a = 87.74 \text{ \AA}$  and  $b = 22.19 \text{ \AA}$ .

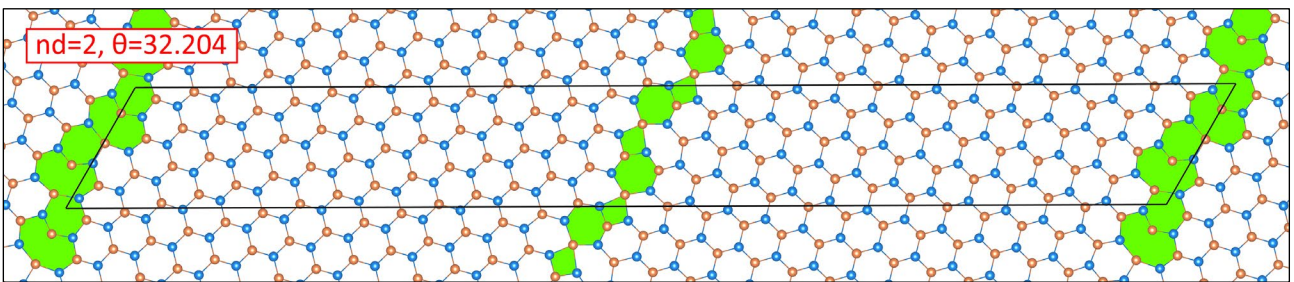

**Figure S3-2-6.** GB model of family  $n_d = 2$  and misorientation angle  $\theta = 32.204^\circ$ . The relaxed simulation cell sizes are  $a = 90.42 \text{ \AA}$  and  $b = 11.41 \text{ \AA}$ .

### 3.3. The family of $n_d = 3$

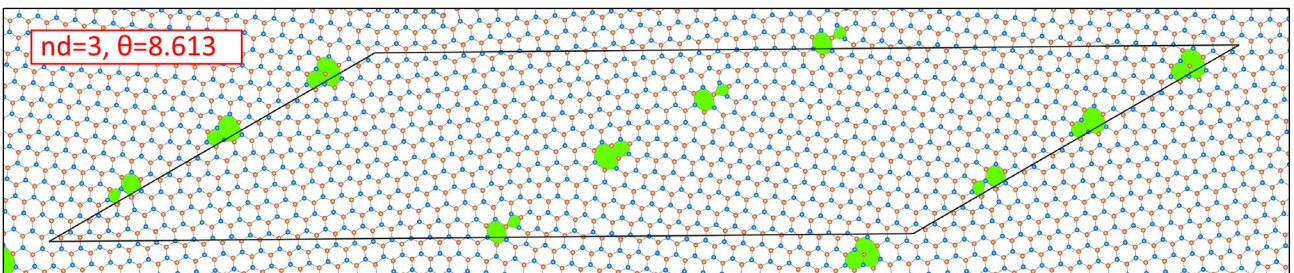

**Figure S3-3-1.** GB model of family  $n_d = 3$  and misorientation angle  $\theta = 8.613^\circ$ . The relaxed simulation cell sizes are  $a = 145.32 \text{ \AA}$  and  $b = 63.25 \text{ \AA}$ .

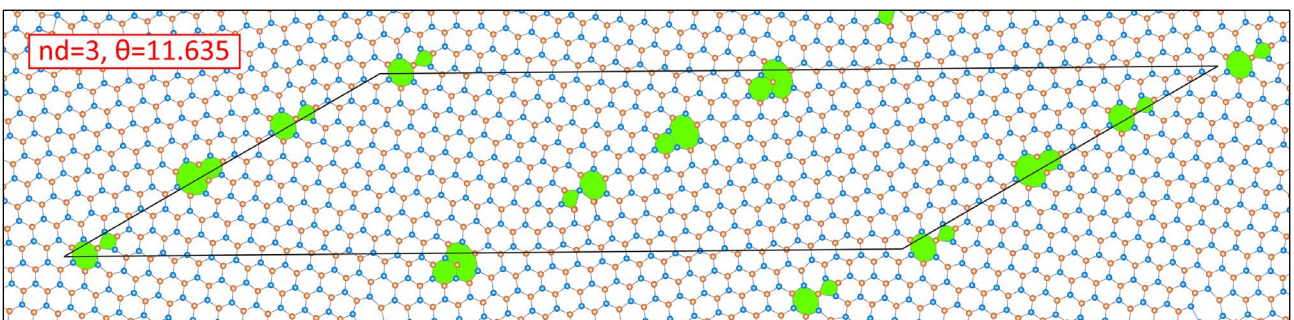

**Figure S3-3-2.** GB model of family  $n_d = 3$  and misorientation angle  $\theta = 11.635^\circ$ . The relaxed simulation cell sizes are  $a = 107.77 \text{ \AA}$  and  $b = 46.89 \text{ \AA}$ .



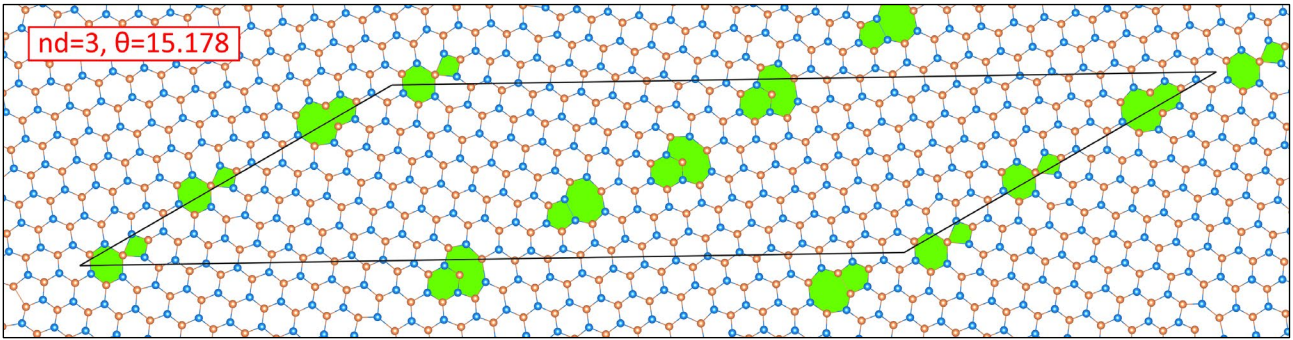

**Figure S3-3-3.** GB model of family  $n_d = 3$  and misorientation angle  $\theta = 15.178^\circ$ . The relaxed simulation cell sizes are  $a = 82.37 \text{ \AA}$  and  $b = 36.01 \text{ \AA}$ .

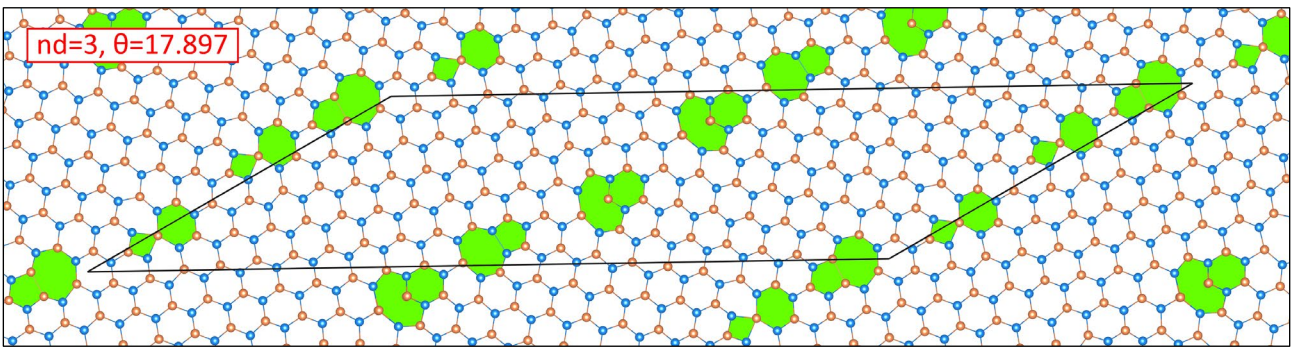

**Figure S3-3-4.** GB model of family  $n_d = 3$  and misorientation angle  $\theta = 17.897^\circ$ . The relaxed simulation cell sizes are  $a = 69.97 \text{ \AA}$  and  $b = 30.59 \text{ \AA}$ .

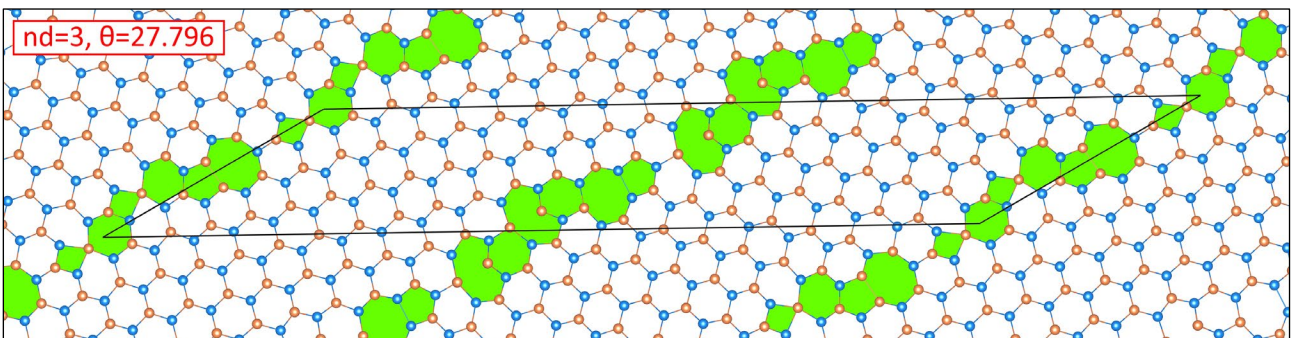

**Figure S3-3-5.** GB model of family  $n_d = 3$  and misorientation angle  $\theta = 27.796^\circ$ . The relaxed simulation cell sizes are  $a = 67.97 \text{ \AA}$  and  $b = 19.76 \text{ \AA}$ .

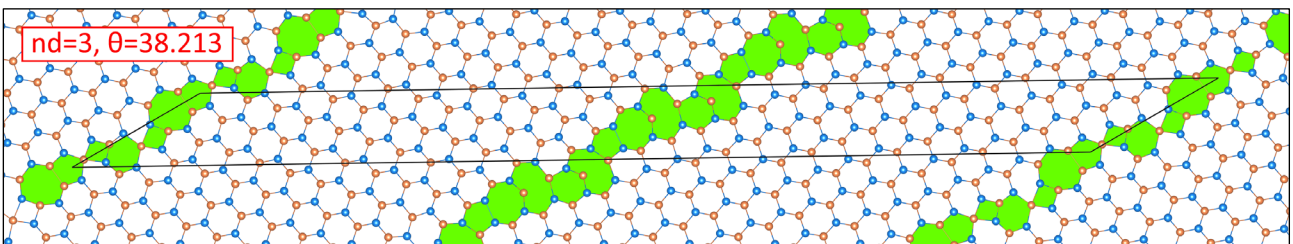

**Figure S3-3-6.** GB model of family  $n_d = 3$  and misorientation angle  $\theta = 38.213^\circ$ . The relaxed simulation cell sizes are  $a = 99.66 \text{ \AA}$  and  $b = 14.49 \text{ \AA}$ .

### 3.4. The family of $n_d = 4$

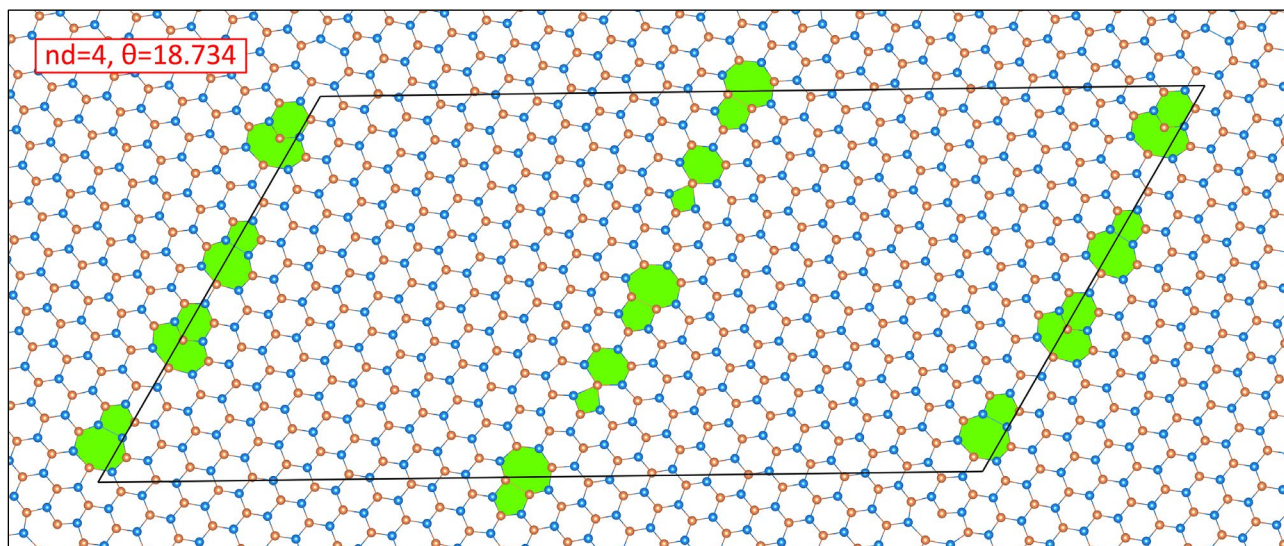

**Figure S3-4-1.** GB model of family  $n_d = 4$  and misorientation angle  $\theta = 18.734^\circ$ . The relaxed simulation cell sizes are  $a = 76.79 \text{ \AA}$  and  $b = 38.60 \text{ \AA}$ .

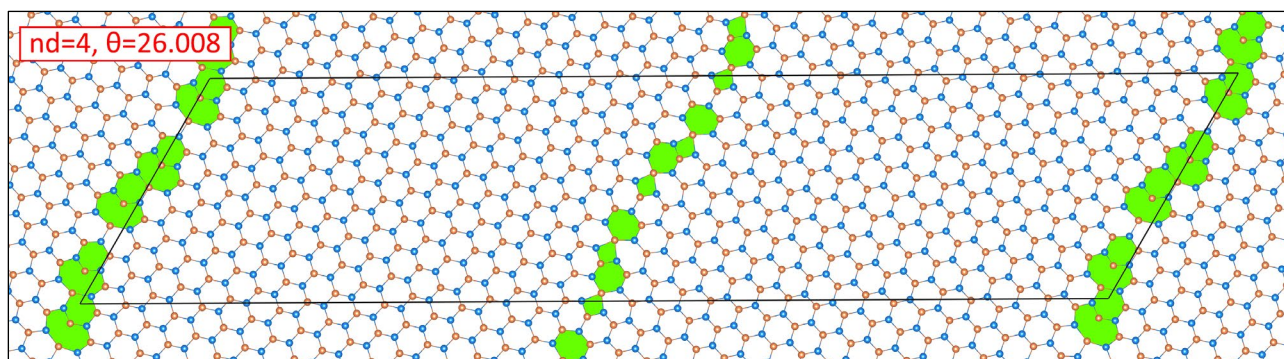

**Figure S3-4-2.** GB model of family  $n_d = 4$  and misorientation angle  $\theta = 26.008^\circ$ . The relaxed simulation cell sizes are  $a = 111.38 \text{ \AA}$  and  $b = 28.13 \text{ \AA}$ .

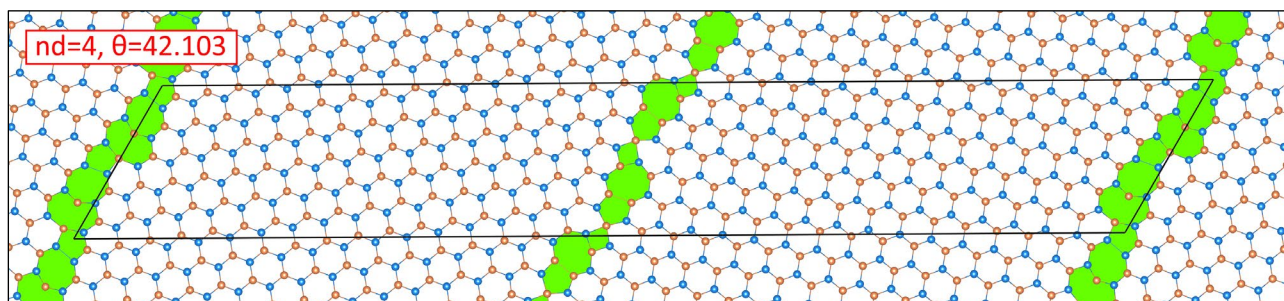

**Figure S3-4-3.** GB model of family  $n_d = 4$  and misorientation angle  $\theta = 42.103^\circ$ . The relaxed simulation cell sizes are  $a = 104.65 \text{ \AA}$  and  $b = 17.62 \text{ \AA}$ .

#### 4. Weak magnetic instability

Magnetic moment could be strongly underestimated by the conventional LDA and GGA functional due to the well-known self-interaction error. This is significantly improved by the recently-developed SCAN (stands for *Strongly Constrained and Appropriately Normed* [5]) meta-GGA, as established in our previous work in transition-metal mono-oxides [4]. Here, we use SCAN implemented in FHI-aims [3] to evaluate the magnetic moments of two systems.

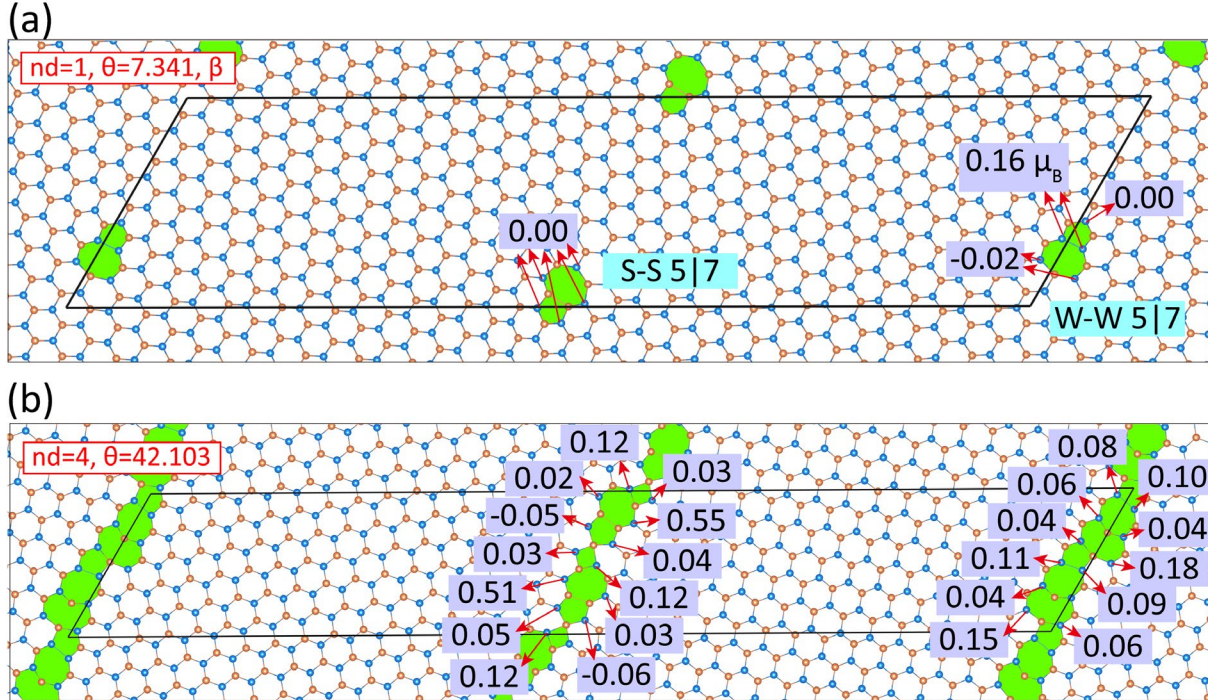

**Figure S4.** Magnetic moments calculated using the SCAN meta-GGA for two GB models. **(a)** Family  $n_d = 1$  and the misorientation angle  $\theta = 7.341^\circ$ . **(b)** Family  $n_d = 4$  and the misorientation angle  $\theta = 42.103^\circ$ . The magnetic moments of W atoms are shown in the unit of  $\mu_B$ .

#### 5. Deriving the critical angle by fitting to the Read-Shockley relation

Carlsson et al. calculated the formation energies of graphene GBs [6], covering various misorientation angles in the range  $0^\circ < \theta \leq 60^\circ$ . They found the Read-Shockley relation for low-angle GBs [7] is valid up to  $\theta_c = 12^\circ$ . However, we argue that the critical angle could be extended to a higher value of  $\theta_c \approx 20^\circ$ , as shown in Figure S5(a). Too strict fitting criteria might have been used in Ref [6]. Following the same approach, we derive a critical angle of  $\theta_c \approx 14^\circ$  for the  $WS_2$ -GBs [Figure S5(b)].

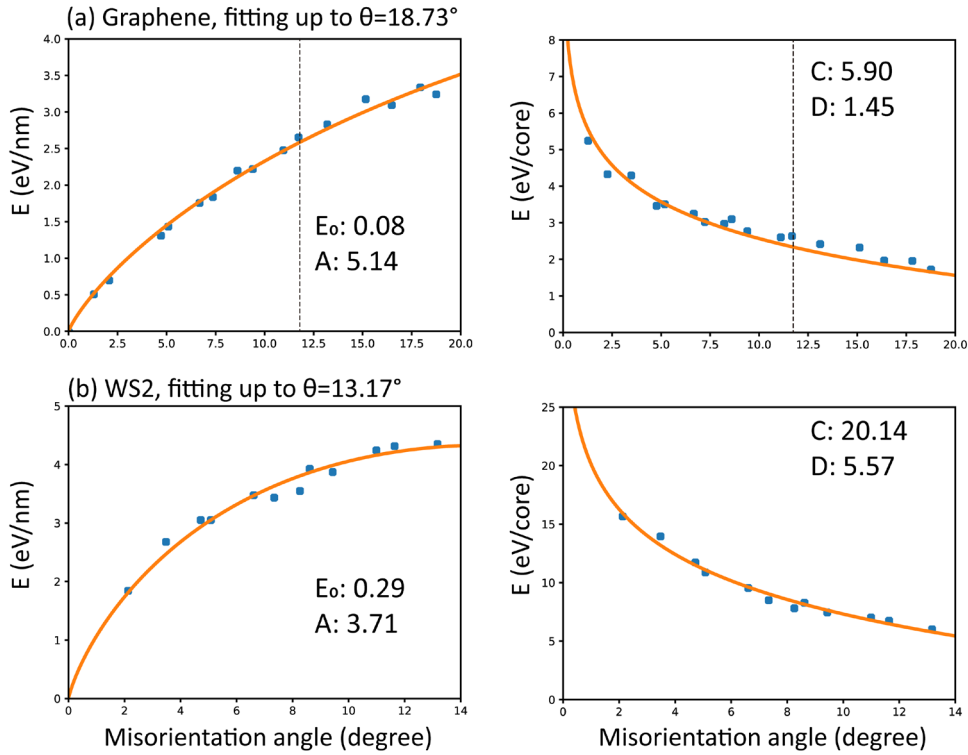

**Figure S5.** Agreement of the calculated data with the Read-Shockley relation. **(a)** Graphene results fitted up to the angle  $\theta = 18.73^\circ$ . **(b)** WS<sub>2</sub> results fitted up to  $\theta = 13.17^\circ$ .

## References

1. José M. Soler, Emilio Artacho, Julian D. Gale, Alberto García, Javier Junquera, Pablo Ordejón, and Daniel Sánchez-Portal, *The SIESTA method for ab initio order-N materials simulation*. Journal of Physics: Condensed Matter. **14**, 2745-2779 (2002).
2. John P. Perdew, Kieron Burke, and Matthias Ernzerhof, *Generalized Gradient Approximation Made Simple*. Physical Review Letters. **77**, 3865-3868 (1996).
3. Volker Blum, Ralf Gehrke, Felix Hanke, Paula Havu, Ville Havu, Xinguo Ren, Karsten Reuter, and Matthias Scheffler, *Ab initio molecular simulations with numeric atom-centered orbitals*. Computer Physics Communications. **180**, 2175-2196 (2009).
4. Yubo Zhang, James Furness, Ruiqi Zhang, Zhi Wang, Alex Zunger, and Jianwei Sun, *Symmetry-breaking polymorphous descriptions for correlated materials without interelectronic U*. Physical Review B. **102**, 045112 (2020).
5. Jianwei Sun, Adrienn Ruzsinszky, and John P Perdew, *Strongly Constrained and Appropriately Normed Semilocal Density Functional*. Physical Review Letters. **115**, 036402 (2015).
6. Johan M. Carlsson, Luca M. Ghiringhelli, and Annalisa Fasolino, *Theory and hierarchical calculations of the structure and energetics of [0001] tilt grain boundaries in graphene*. Physical Review B. **84**, (2011).
7. W. T. Read and W. Shockley, *Dislocation Models of Crystal Grain Boundaries*. Physical Review. **78**, 275-289 (1950).
